# Supplementary material for: A self-assembled graphene nanomask for the epitaxial growth of nonplanar and planar GaN
Source: Royal Society of Chemistry journal article supplement (doi:10.1039/c9ce00970a), 2019-01-01
Supplement: c9ce00970a1.pdf [file c9ce00970a1.pdf]

## Supporting Information

### **Self-assembly graphene nanomask for epitaxial growth of nonplanar and planar GaN**

Yu Xu,<sup>a,b</sup> Bing Cao,<sup>\*,c,d</sup> Zongyao Li,<sup>b</sup> Shunan Zheng,<sup>a</sup> Demin Cai,<sup>b</sup> Mingyue Wang,<sup>a,b</sup> Yumin Zhang,<sup>a,b</sup> Jianfeng Wang,<sup>a,b</sup> Chinhua Wang,<sup>c,d</sup> and Ke Xu<sup>\*,a,b</sup>

*<sup>a</sup>Suzhou Institute of Nano-Tech and Nano-Bionics (SINANO), Chinese Academy of Sciences (CAS), Suzhou 215123, People's Republic of China*

*<sup>b</sup>Suzhou Nanowin Science and Technology Co., Ltd., Suzhou 215123, People's Republic of China*

*<sup>c</sup>School of Optoelectronic Science and Engineering & Collaborative Innovation Center of Suzhou Nano Science and Technology, Soochow University, Suzhou 215006, People's Republic of China*

*<sup>d</sup>Key Lab of Advanced Optical Manufacturing Technologies of Jiangsu Province & Key Lab of Modern Optical Technologies of Education Ministry of China, Soochow University, Suzhou 215006, People's Republic of China*

\*E-mail: bcao2006@163.com; kxu2006@sinano.ac.cn.

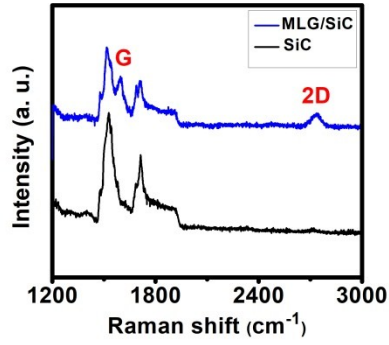

Figure S1. Raman spectrum of the MLG/SiC and pure SiC substrate at the wave number of 1200 to 3000  $\text{cm}^{-1}$ . Clear G and 2D bands of MLG and secondary bands of SiC can be seen.

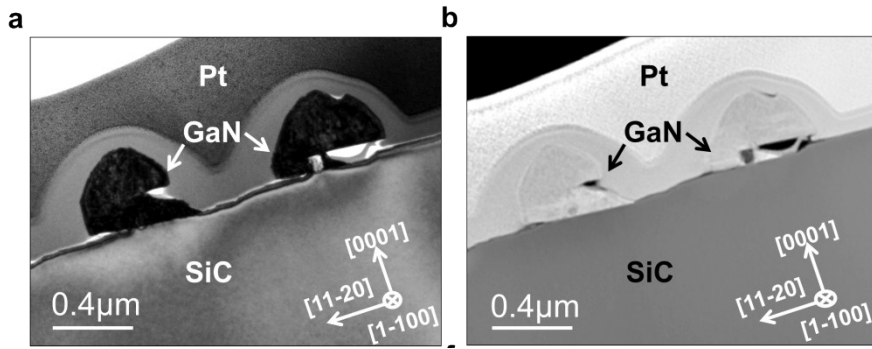

Figure S2. (a) TEM and (b) HAADF images of GaN nanowalls SNSAG on MLG/SiC.

Table S1. The difference of diffraction spots distance of GaN and SiC. (a and c: the lattice parameters; hkl: crystal indices; d: interplanar crystal spacing). The small  $\Delta 1/d$  results the SAED patterns of GaN and SiC are overlap.

|     | a<br>[nm] | c<br>[nm] | (hkl)  | d<br>[nm] | 1/d<br>[1/nm] | $\Delta 1/d$<br>[1/nm] |
|-----|-----------|-----------|--------|-----------|---------------|------------------------|
| GaN | 0.3189    | 0.5185    | (002)  | 0.259     | 3.857         | 0.122                  |
|     |           |           | (-210) | 0.159     | 6.272         | 0.237                  |
| SiC | 0.3073    | 1.0053    | (004)  | 0.251     | 3.979         |                        |
|     |           |           | (-210) | 0.154     | 6.508         |                        |

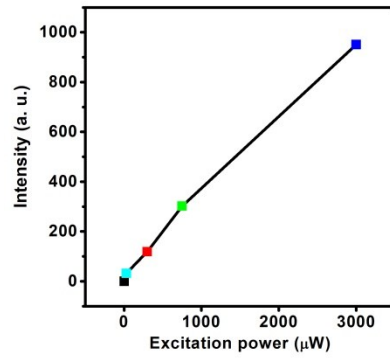

Figure S3. Plot of integrated intensity of the emission as a function of the excitation power.

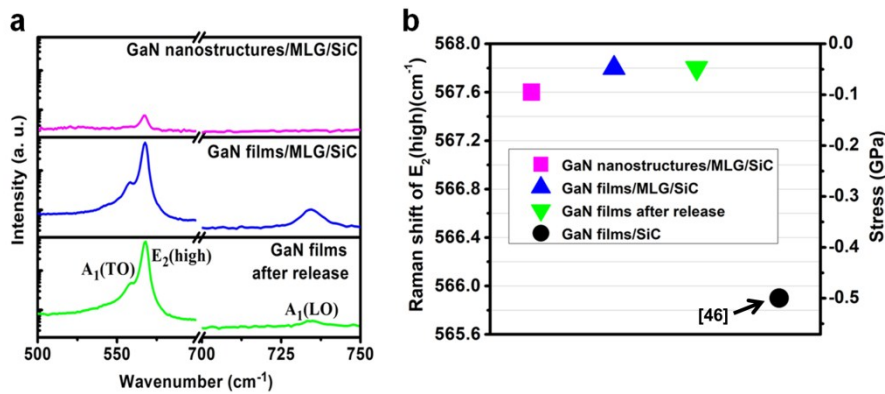

Figure S4. (a) Raman spectra of the GaN nanostructures/MLG/SiC, GaN films/MLG/SiC, and GaN films after release at the wavenumber of 500 to 750 nm. (b) Raman shift of  $E_2$  (high) and stress of GaN. Black circle correspond to 1.65  $\mu\text{m}$ -thick GaN films grown directly on 4H-SiC with similar miscut angle of  $3.4^\circ$ ,<sup>1</sup> the stress was -0.5 GPa (10 times than that of GaN/MLG/SiC), and there were a lot of cracks formed in GaN/SiC.

Table S2. Stress of GaN nanostructures and films grown on MLG/SiC and after release.

| Sample                     | $E_2$ (high)<br>[nm] | Stress <sup>a</sup><br>[GPa] |
|----------------------------|----------------------|------------------------------|
| GaN nanostructures/MLG/SiC | 567.6                | -0.10                        |
| GaN films/MLG/SiC          | 567.8                | -0.05                        |
| GaN films after release    | 567.8                | -0.05                        |

<sup>a)</sup> The stress is calculated by the formula as follow:

$$\sigma = \frac{\Delta\omega}{K} (\text{cm}^{-1} \text{GPa}^{-1})$$

where  $\sigma$  is the biaxial stress,  $\Delta\omega$  is the  $E_2$  frequency shift and  $K$  is the Raman stress factor. The unstressed GaN  $E_2$  (high) at  $568.0 \text{ cm}^{-1}$ ,  $K=4.2 \text{ cm}^{-1} \text{GPa}^{-1}$ .<sup>2</sup>

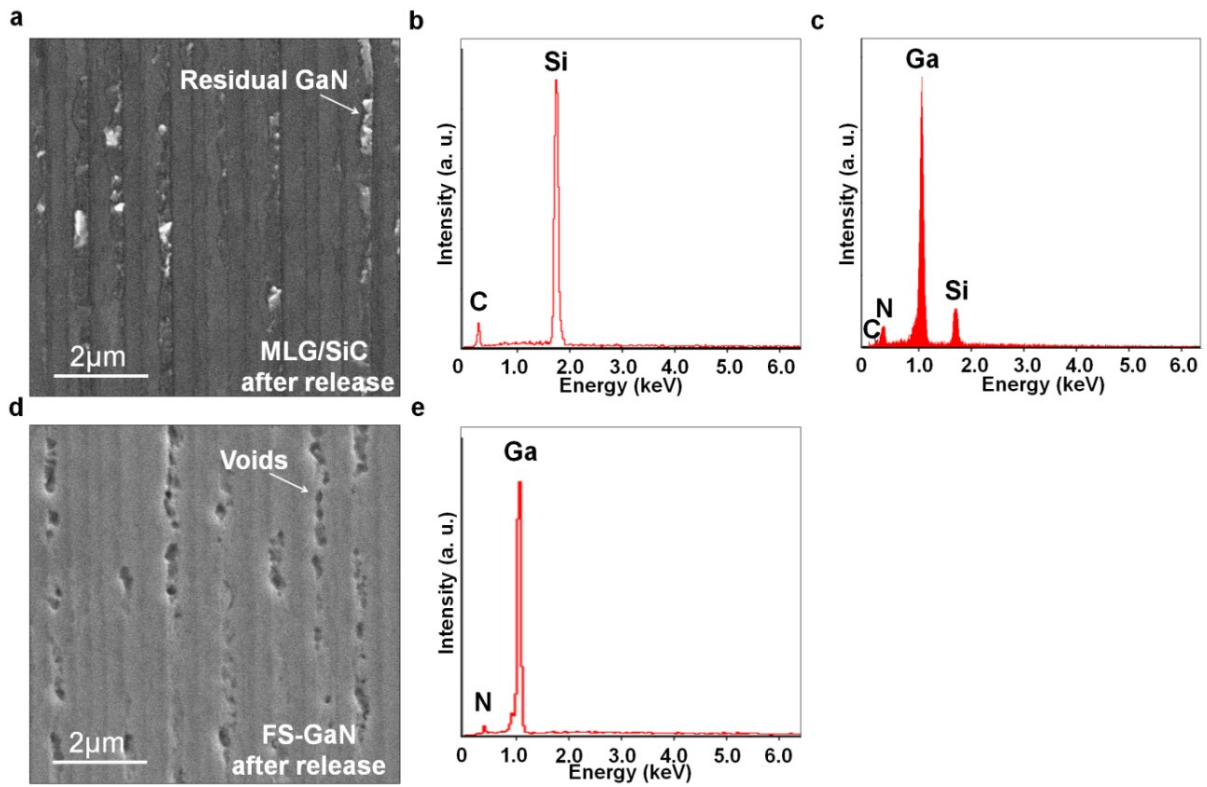

Figure S5. (a) Surface morphology of MLG/SiC after GaN films release. (b) and (c) EDX spectra of MLG/SiC and residual GaN on MLG/SiC after release. (d) Surface morphology of the back surface of FS-GaN after release. (e) EDX spectra of the voids on the surface of GaN microrod. It indicates that the GaN films are SNSAG on MLG/SiC.

Table S3. The crystalline quality of GaN films vdWE/RE/SAG/SNSAG on graphene.

| Structure                             | Growth type | Thickness ( $\mu\text{m}$ ) | Crystalline        | FWHM(0002) (arcsec) | TDDs ( $\times 10^8 \text{cm}^{-2}$ ) | Method | Ref.      |
|---------------------------------------|-------------|-----------------------------|--------------------|---------------------|---------------------------------------|--------|-----------|
| GaN/ZnO/graphene/SiO <sub>2</sub> /Si | vdWE        | ~5                          | Grain boundary     | -                   | 12~24                                 | TEM    | 14        |
| GaN/ZnO/graphene/SiO <sub>2</sub> /Si | vdWE        | ~5                          | Grain boundary     | -                   | 13                                    | TEM    | 15        |
| GaN/graphene/SiO <sub>2</sub> /Si     | vdWE        | 10                          | Grain boundary     | -                   | 8-36                                  | TEM    | 16        |
| GaN/graphene/SiC                      | RE          | 2.5                         | Single crystalline | 222                 | 10                                    | TEM    | 27        |
| GaN/graphene/SiC                      | SAG         | 1.5                         | Inversion domain   | -                   | 30                                    | TEM    | 28        |
| GaN/graphene/GaN/sapphire             | SAG         | 40                          | Single-crystalline | 154                 | 0.18                                  | EPD    | 29        |
| GaN/graphene/GaN/sapphire             | SAG         | 20                          | Single-crystalline | 276                 | 1.7~1.8                               | CL     | 30        |
| GaN/graphene/SiC                      | SNSAG       | 150                         | Single-crystalline | 43                  | 0.059                                 | CL     | This work |

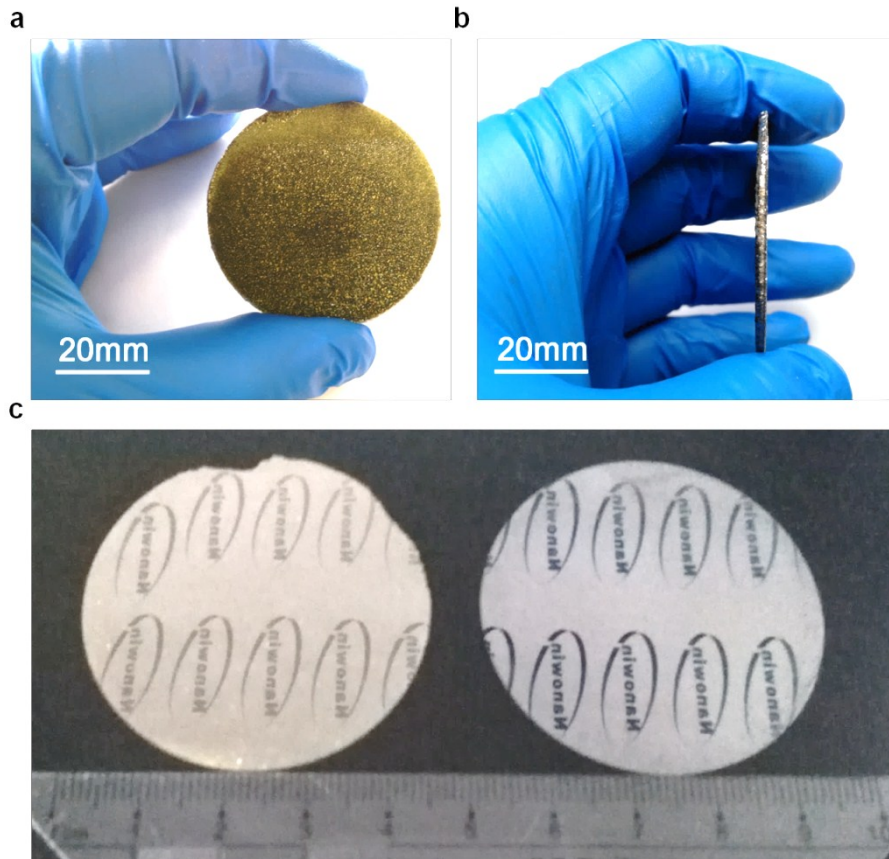

Figure S6. (a) Photograph of crack-free, 1.2 mm-thick GaN films SNSAG on MLG/SiC. (b) Cross-section photograph of the GaN films SNSAG on MLG/SiC. (c) Photograph of crack-free, mechanical exfoliated FS-GaN (left) after single side chemical mechanical polishing and the corresponding MLG/SiC substrate (right). Mirror reflection of Nanowin logo which was set above the samples when taking photo. The bow of the substrate was about  $19\ \mu\text{m}$  (radius of bowing is  $17\ \text{m}$ ), which is lower than the one fabricated by laser lift-off (radius of bowing was  $4.6\ \text{m}$  and bow was about  $70\ \mu\text{m}$ ).<sup>3</sup> Such low bow value may be caused by nearly-free stress of GaN films after growth.

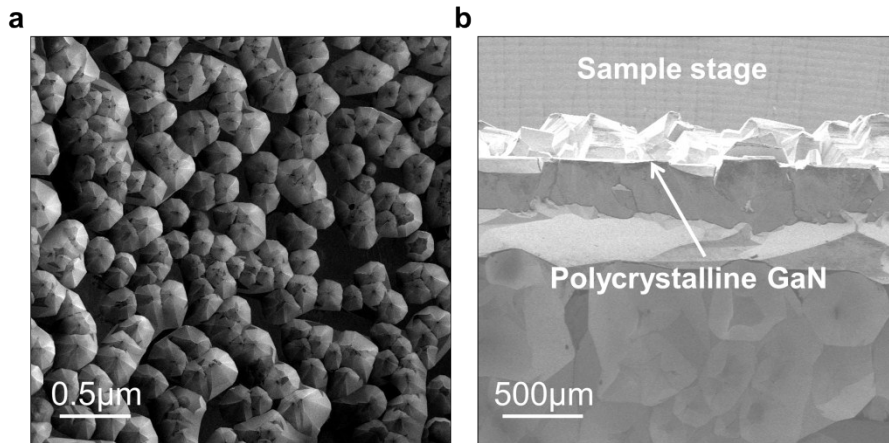

Figure S7. (a) SEM image of surface morphology of the GaN films SNSAG on MLG/SiC. (b) SEM image of the edge morphology of GaN films SNSAG on MLG/SiC. The surface of GaN films is not smooth as the surface deterioration of GaN films when thickness is more than 1 mm. In addition, because of polycrystalline GaN exists at the edges of substrate, directly mechanical exfoliation of GaN can not obtain FS-GaN without cracks. Therefore, polycrystalline GaN should be eliminated by cylindrical grinding machine, and then the GaN films can be mechanically exfoliated without any stressor layer.

## REFERENCES

- <sup>1</sup>J. Pernot, E. Bustarret, M. Rudzinski, P. R. Hageman and P. K. Larsen, *J. Appl. Phys.*, 2007, **101**, 033536.
- <sup>2</sup>C. Kisielowski, J. Kruger, S. Ruvimov, T. Suski, J. W. Ager, E. Jones, Z. LilientalWeber, M. Rubin, E. R. Weber, M. D. Bremser and R. F. Davis, *Phys. Rev. B*, 1996, **54**, 17745-17753.
- <sup>3</sup>T. Paskova, V. Darakchieva, P. P. Paskov, B. Monemar, M. Bukowski, T. Suski, N. Ashkenov, M. Schubert and D. Hommel, *Phys. Status Solidi C*, 2006, **3**, 1475-1478.
